# Supplementary material
Source: PubMed Central journal article supplement (PMC2823536)
Supplement: supp_M109.044305_jbc.M109.044305-1.pdf [file supp_M109.044305_jbc.M109.044305-1.pdf]

## Supplemental Data

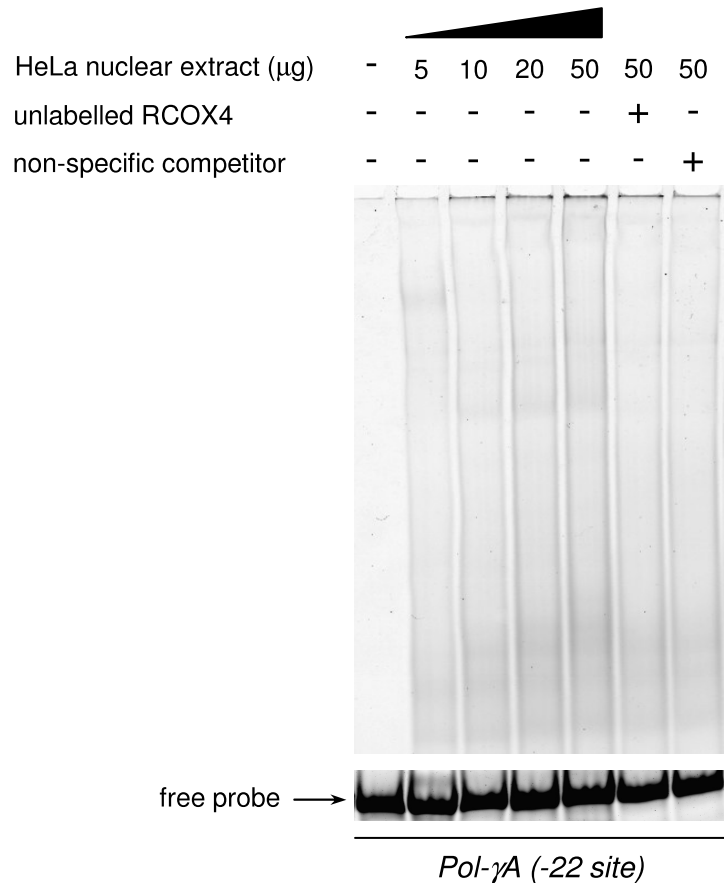

**FIGURE S1. NRF-2 does not bind *in vitro* the predicted -22 site in Pol-γA gene promoter.** NRF-2 binding was evaluated by EMSA using increasing amounts (from 5 µg to 50 µg) of Heparin-Sepharose purified HeLa nuclear extract and a radiolabelled double-stranded oligonucleotide probe containing the NRF-2 predicted -22 site. The unlabelled specific (RCOX4) and non-specific competitor oligonucleotides (100-fold molar excess) are indicated above each lane. The figure shows that no binding to the probe occurred in the presence of increasing amounts of protein extract.

**Table S1**

**Dataset of functional NRF-2 binding sites that were aligned to obtain the NRF-2 consensus.**

| <b>NRF-2 site</b>    | <b>Sequence</b> | <b>Position</b> | <b>Reference</b>                                                               |
|----------------------|-----------------|-----------------|--------------------------------------------------------------------------------|
| COX17(-107)          | ACAGGAAGTC      | -107            | Takahashi Y. et al. (2002) <i>Biochim. Biophys. Acta</i> , 1574, 359-364       |
| COX17(-83)           | TGCGGAAGTG      | -83             | " " " "                                                                        |
| PRDX5- $\alpha$      | CCCGGAAGTG      | -513            | Kropotov A. et al. (2007) <i>FEBS J.</i> , 274, 5804-5814                      |
| PRDX5- $\beta$       | ACCGGAAGTG      | -468            | " " " "                                                                        |
| PRDX5- $\gamma$      | ACCGGAAGCG      | -383            | " " " "                                                                        |
| PRDX5- $\delta$      | CCCGGAAGCT      | -40             | " " " "                                                                        |
| TOMM20-A             | ACCGGAAGTG      | -23             | Blesa J.R. et al (2007) <i>Gene</i> , 391, 198-208                             |
| IF2mt(-52)           | ACCGGAAGCC      | -52             | Hayashi R. et al. (2007) <i>Mitochondrion</i> , 7, 195-203                     |
| TOMM70-A             | CCCGGAAGTG      | -70             | Blesa J.R. et al (2006) <i>Biochem. Cell Biol.</i> , 84, 813-822               |
| TOMM70-B             | ACCGGAAGCC      | -154            | " " " "                                                                        |
| TFAM                 | ACCGGATGTT      | -7              | Virbasius J.V. et al. (1994) <i>Proc. Natl. Acad. Sci. USA</i> , 91, 1309-1313 |
| TFB1M(-105)          | ACAGGAAATT      | -105            | Gleyzer N. et al. (2005) <i>Mol. Cell. Biol.</i> , 25, 1354-1366               |
| TFB1M(-85)           | ACCGGAAGCG      | -85             | " " " "                                                                        |
| TFB2M(-51)           | AGCGGAAGTG      | -51             | " " " "                                                                        |
| TFB2M(-31)           | GCAGGAAGGC      | -31             | " " " "                                                                        |
| COX4i1(+3)           | ACCGGAAGAG      | +3              | Ongwijitwat S. et al. (2005) <i>Gene</i> , 360, 65-77                          |
| COX4i1(+24)          | ACCGGAAGAG      | +24             | " " " "                                                                        |
| COX6A1               | GCCGGAAGCG      | +27             | " " " "                                                                        |
| COX6B(-36)           | GCCGGAAGCT      | -36             | " " " "                                                                        |
| COX6B2(-24)          | ACGGGAAGCG      | -24             | " " " "                                                                        |
| COX7B                | TTGGGAAATG      | -116            | " " " "                                                                        |
| COX7C(-28)           | CCAGGAAGTC      | -28             | " " " "                                                                        |
| COX7C(-11)           | AAGGGAAGAT      | -11             | " " " "                                                                        |
| COX8a                | GCCGGAAGTT      | -72             | " " " "                                                                        |
| mTERF(-48)           | GCCGGAAGTT      | -48             | <i>this paper</i>                                                              |
| mTERF(-29)           | AGCGGAAGTG      | -29             | <i>this paper</i>                                                              |
| POLRMT(-61)          | GCCGGAAGTA      | -61             | <i>this paper</i>                                                              |
| TWINKLE              | ACCGGAAGCC      | -45             | <i>this paper</i>                                                              |
| mtSSB                | GCCGGAAGTG      | -11             | <i>this paper</i>                                                              |
| POL- $\gamma$ B(-61) | CCCGGAAGCG      | -61             | <i>this paper</i>                                                              |

|   |           |               |       |                    |
|---|-----------|---------------|-------|--------------------|
| A | <b>CA</b> | <b>GGAAG</b>  | TC    | <i>COX17(-107)</i> |
| T | <b>G</b>  | <b>CGGAAG</b> | TG    | <i>COX17(-83)</i>  |
| C | <b>CC</b> | <b>GGAAG</b>  | TG    | <i>PRDX5-α</i>     |
| A | <b>CC</b> | <b>GGAAG</b>  | TG    | <i>PRDX5-β</i>     |
| A | <b>CC</b> | <b>GGAAG</b>  | CG    | <i>PRDX5-γ</i>     |
| C | <b>CC</b> | <b>GGAAG</b>  | CT    | <i>PRDX5-δ</i>     |
| A | <b>CC</b> | <b>GGAAG</b>  | TG    | <i>TOMM20-A</i>    |
| A | <b>CC</b> | <b>GGAAG</b>  | CC    | <i>IF2mt(-52)</i>  |
| C | <b>CC</b> | <b>GGAAG</b>  | TG    | <i>TOMM70-A</i>    |
| A | <b>CC</b> | <b>GGAAG</b>  | CC    | <i>TOMM70-B</i>    |
| A | <b>CC</b> | <b>GGA</b>    | TGTT  | <i>TFAM</i>        |
| A | <b>CA</b> | <b>GGA</b>    | AAIT  | <i>TFB1M(-105)</i> |
| A | <b>CC</b> | <b>GGAAG</b>  | CG    | <i>TFB1M(-85)</i>  |
| A | <b>G</b>  | <b>CGGAAG</b> | TG    | <i>TFB2M(-51)</i>  |
| G | <b>CA</b> | <b>GGAAG</b>  | GC    | <i>TFB2M(-31)</i>  |
| A | <b>CC</b> | <b>GGAAG</b>  | AG    | <i>COX4i1(+3)</i>  |
| A | <b>CC</b> | <b>GGAAG</b>  | AG    | <i>COX4i1(+24)</i> |
| G | <b>CC</b> | <b>GGAAG</b>  | CG    | <i>COX6A1</i>      |
| G | <b>CC</b> | <b>GGAAG</b>  | CT    | <i>COX6B(-36)</i>  |
| A | <b>C</b>  | <b>GGAAG</b>  | CG    | <i>COX6B(-24)</i>  |
| T | <b>T</b>  | <b>GGA</b>    | AAITG | <i>COX7B</i>       |
| C | <b>CA</b> | <b>GGAAG</b>  | TC    | <i>COX7C(-28)</i>  |
| A | <b>A</b>  | <b>GGAAG</b>  | AT    | <i>COX7C(-11)</i>  |
| G | <b>CC</b> | <b>GGAAG</b>  | TT    | <i>COX8a</i>       |
| G | <b>CC</b> | <b>GGAAG</b>  | TT    | <i>mTERF(-48)</i>  |
| A | <b>G</b>  | <b>CGGAAG</b> | TG    | <i>mTERF(-29)</i>  |
| G | <b>CC</b> | <b>GGAAG</b>  | TA    | <i>POLRMT(-61)</i> |
| A | <b>CC</b> | <b>GGAAG</b>  | CC    | <i>TWINKLE</i>     |
| G | <b>CC</b> | <b>GGAAG</b>  | TG    | <i>mtSSB</i>       |
| C | <b>CC</b> | <b>GGAAG</b>  | CG    | <i>POL-γB(-61)</i> |

**FIGURE S2. Multiple alignment of functional NRF-2 binding sites from mitochondrial protein gene promoters.** The box defines the block of conserved residues; nucleotides identical in all sequences have a black background, nucleotides well conserved are indicated by black bold letters and the remainder are in regular black. Sequence names are reported to the right.

**Table S2**

**Prediction of transcription factor binding sites (TFBSs) in the promoter of proteins involved in DNA replication and/or repair and associated with mitochondria. The analysis was performed by using MAPPER search engine.**

| Gene symbol | GenBank accession | Protein name                            | Positions of predicted TFBSs (scoring $\geq 2.5$ ) |              |                                              |                 |
|-------------|-------------------|-----------------------------------------|----------------------------------------------------|--------------|----------------------------------------------|-----------------|
|             |                   |                                         | <i>NRF-1</i>                                       | <i>NRF-2</i> | <i>Sp1</i>                                   | <i>CAAT-box</i> |
| APEX1       | NM_001641         | Apurinic-apyrimidinic endonuclease 1    | -                                                  | -            | -141                                         | -58             |
| DNA2        | NM_001080449      | DNA2-like helicase                      | -118<br>-62<br>-45                                 | -            | -108                                         | -               |
| FEN1        | NM_004111         | Flap endonuclease 1                     | -                                                  | -86          | -262                                         | -               |
| LIG3        | NM_002311         | DNA ligase III                          | -32                                                | -            | -166<br>-70                                  | -               |
| MPG         | NM_001015052      | N-methylpurine DNA glycosylase          | -296<br>-54                                        | -68          | -287<br>-271<br>-239<br>-123<br>-43          | -               |
| MUTYH       | NM_001048171      | A/G-specific adenine DNA glycosylase    | -                                                  | -            | -                                            | -               |
| NEIL1       | NM_024608         | Endonuclease VIII-like 1                | -                                                  | -            | -121                                         | -               |
| NEIL2       | NM_145043         | Endonuclease VIII-like 2                | -158                                               | -            | -213<br>-118<br>-105<br>-26                  | -               |
| NTHL1       | NM_002528         | Endonuclease III-like protein 1         | -                                                  | -127<br>-110 | -264<br>-176                                 | -               |
| NUDT1       | NM_002452         | 7,8-dihydro-8-oxoguanine triphosphatase | -91                                                | -25          | -383<br>-367<br>-265<br>-232<br>-151<br>-118 | -60             |
| OGG1        | NM_002542         | 8-oxoguanine DNA glycosylase / AP lyase | -105                                               | -            | -319<br>-87                                  | -70<br>-44      |
| PIF1        | NM_025049         | PIF1 DNA helicase homolog               | -                                                  | -            | -196                                         | -371<br>-339    |
| RNASEH1     | NM_002936         | Ribonuclease H1                         | -                                                  | -            | -301<br>-279<br>-32                          | -               |
| TOP1MT      | NM_052963         | Mitochondrial DNA topoisomerase I       | -                                                  | -            | -219<br>-84<br>-65<br>-46<br>-36<br>-23      | -               |
| UNG1        | NM_003362         | Uracil-DNA glycosylase                  | -94<br>-38                                         | -            | -140<br>-130<br>-104<br>-66                  | -               |
